# Supplementary material for: Reproducibility and Relative Validity of the Healthy Eating Index-2015 and Nutrient-Rich Food Index 9.3 Estimated by Comprehensive and Brief Diet History Questionnaires in Japanese Adults
Source: MDPI journal article supplement (doi:10.3390/nu11102540), 2019-10-21
Supplement: s1 [file s1]

**Table S1.** Age- and sex-specific reference daily values used for the calculation of NRF9.3<sup>a</sup>

|                                          | 30-49 years |       | 50-69 years |       | ≥70 years |      |
|------------------------------------------|-------------|-------|-------------|-------|-----------|------|
|                                          | Women       | Men   | Women       | Men   | Women     | Men  |
| Energy (kcal) <sup>b</sup>               | 2000        | 2650  | 1900        | 2450  | 1750      | 2200 |
| Energy (kJ) <sup>c</sup>                 | 8368        | 11088 | 7950        | 10251 | 7322      | 9205 |
| Qualifying nutrients                     |             |       |             |       |           |      |
| Protein (g) <sup>c</sup>                 | 50          | 60    | 50          | 60    | 50        | 60   |
| Dietary fibre (g) <sup>d</sup>           | 18          | 20    | 18          | 20    | 17        | 19   |
| Vitamin A (µg RAE) <sup>c</sup>          | 700         | 900   | 700         | 850   | 650       | 800  |
| Vitamin C (mg) <sup>c</sup>              | 100         | 100   | 100         | 100   | 100       | 100  |
| Vitamin D (µg) <sup>e</sup>              | 5.5         | 5.5   | 5.5         | 5.5   | 5.5       | 5.5  |
| Calcium (mg) <sup>c</sup>                | 650         | 650   | 650         | 700   | 650       | 700  |
| Iron (mg) <sup>c</sup>                   | 10.5        | 7.5   | 6.5         | 7.5   | 6         | 7    |
| Potassium (mg) <sup>d</sup>              | 2600        | 3000  | 2600        | 3000  | 2600      | 3000 |
| Magnesium (mg) <sup>c</sup>              | 290         | 370   | 290         | 350   | 270       | 320  |
| Disqualifying nutrients                  |             |       |             |       |           |      |
| Added sugars (g) <sup>f</sup>            | 25          | 33.1  | 23.8        | 30.6  | 21.9      | 27.5 |
| Saturated fats (g) <sup>g</sup>          | 15.6        | 20.6  | 14.8        | 19.1  | 13.6      | 17.1 |
| Sodium (g NaCl equivalent) <sup>dh</sup> | 7           | 8     | 7           | 8     | 7         | 8    |

NRF9.3, Nutrient-Rich Food Index 9.3; RAE, retinol activity equivalent. <sup>a</sup> Values were derived from the Dietary Reference Intakes for Japanese, 2015, except for added sugars (as shown below). <sup>b</sup> Estimated Energy Requirement for moderate level of physical activity. <sup>c</sup> Recommended Dietary Allowance. <sup>d</sup> Tentative dietary goal for preventing lifestyle-related diseases (DG). <sup>e</sup> Adequate Intake. <sup>f</sup> Determined based on the World Health Organization's conditional recommendation (5% of energy). <sup>g</sup> Determined based on the DG value (7% of energy). <sup>h</sup> 7 g NaCl equivalent = 2756 mg sodium; 8 g NaCl equivalent = 3150 mg sodium.

**Table S2.** HEI-2015 and NRF9.3 total scores estimated from a 4-day weighed dietary record (DR), a comprehensive diet history questionnaire (DHQ) and a brief diet history questionnaire (BDHQ) conducted in each season over one year and intraclass correlation in Japanese women and men <sup>a</sup>

|                 | Autumn <sup>b</sup> |     | Winter <sup>c</sup> |     | Spring <sup>d</sup> |     | Summer <sup>e</sup> |     | Intraclass correlation |
|-----------------|---------------------|-----|---------------------|-----|---------------------|-----|---------------------|-----|------------------------|
|                 | Mean                | SD  | Mean                | SD  | Mean                | SD  | Mean                | SD  |                        |
| Women (n 121)   |                     |     |                     |     |                     |     |                     |     |                        |
| HEI-2015        |                     |     |                     |     |                     |     |                     |     |                        |
| DR <sup>f</sup> | 56.0                | 6.6 | 54.1                | 7.0 | 52.4                | 7.4 | 54.5                | 7.4 | 0.51                   |
| DHQ             | 57.3                | 7.2 | 55.6                | 6.7 | 54.6                | 6.8 | 56.1                | 6.8 | 0.60                   |
| BDHQ            | 58.3                | 4.7 | 57.3                | 4.5 | 56.4                | 5.2 | 55.5                | 5.8 | 0.51                   |
| NRF9.3          |                     |     |                     |     |                     |     |                     |     |                        |
| DR <sup>f</sup> | 698                 | 100 | 680                 | 102 | 656                 | 129 | 673                 | 106 | 0.62                   |
| DHQ             | 675                 | 92  | 660                 | 94  | 643                 | 107 | 654                 | 99  | 0.68                   |
| BDHQ            | 759                 | 73  | 748                 | 73  | 735                 | 80  | 715                 | 88  | 0.59                   |
| Men (n 121)     |                     |     |                     |     |                     |     |                     |     |                        |
| HEI-2015        |                     |     |                     |     |                     |     |                     |     |                        |
| DR <sup>f</sup> | 55.2                | 6.9 | 53.5                | 6.9 | 51.6                | 6.3 | 53.4                | 6.3 | 0.39                   |
| DHQ             | 54.8                | 7.2 | 54.0                | 6.9 | 52.7                | 6.7 | 53.9                | 7.2 | 0.61                   |
| BDHQ            | 56.5                | 5.8 | 55.6                | 5.2 | 55.1                | 5.4 | 54.1                | 5.0 | 0.47                   |
| NRF9.3          |                     |     |                     |     |                     |     |                     |     |                        |
| DR <sup>f</sup> | 719                 | 91  | 706                 | 86  | 685                 | 96  | 694                 | 92  | 0.59                   |
| DHQ             | 674                 | 91  | 658                 | 89  | 650                 | 88  | 660                 | 99  | 0.55                   |
| BDHQ            | 740                 | 83  | 733                 | 69  | 726                 | 83  | 711                 | 85  | 0.53                   |

HEI-2015, Healthy Eating Index-2015; NRF9.3, Nutrient-Rich Food Index 9.3. <sup>a</sup> For both HEI-2015 and NRF9.3, a higher score indicates a higher diet quality. <sup>b</sup> November and December 2002 for DR and November for DHQ and BDHQ. <sup>c</sup> February 2003. <sup>d</sup> May 2003. <sup>e</sup> August and September 2003. <sup>f</sup> For each individual, the mean value of the 4-day data was used.

**Table S3.** Dietary intake according to tertile category of the NRF9.3 total score estimated from a 16-day weighed dietary record in Japanese women and men <sup>a</sup>.

|                                 | Women       |             |             | P for trend <sup>b</sup> | Men         |              |             | P for trend <sup>b</sup> |
|---------------------------------|-------------|-------------|-------------|--------------------------|-------------|--------------|-------------|--------------------------|
|                                 | T1 (n=40)   | T2 (n=41)   | T3 (n=40)   |                          | T1 (n=40)   | T2 (n=41)    | T3 (n=40)   |                          |
| NRF9.3 total score <sup>c</sup> | 603 ± 83    | 718 ± 27    | 790 ± 22    | ---                      | 642 ± 67    | 740 ± 19     | 800 ± 24    | ---                      |
| NRF9.3 total score (median)     | 625         | 724         | 792         | ---                      | 671         | 739          | 796         | ---                      |
| NRF9.3 score components         |             |             |             |                          |             |              |             |                          |
| Protein (% of energy)           | 14.0 ± 1.3  | 15.1 ± 1.4  | 16.2 ± 1.5  | <0.0001                  | 13.5 ± 1.5  | 14.4 ± 1.4   | 15.1 ± 1.7  | <0.0001                  |
| Dietary fibre (g/4184 kJ)       | 6.3 ± 1.4   | 8.4 ± 1.7   | 9.2 ± 1.7   | <0.0001                  | 5.3 ± 1.0   | 6.5 ± 1.4    | 8.1 ± 1.4   | <0.0001                  |
| Vitamin A (µg RAE/4184 kJ)      | 284 ± 154   | 351 ± 212   | 441 ± 228   | 0.001                    | 225 ± 122   | 331 ± 196    | 405 ± 295   | 0.0003                   |
| Vitamin C (mg/4184 kJ)          | 45.4 ± 16.6 | 63.1 ± 15.6 | 78.0 ± 18.8 | <0.0001                  | 37.0 ± 11.3 | 50.5 ± 15.0  | 66.8 ± 19.0 | <0.0001                  |
| Vitamin D (µg/4184 kJ)          | 3.2 ± 1.1   | 4.2 ± 1.6   | 5.3 ± 1.9   | <0.0001                  | 3.3 ± 1.3   | 4.2 ± 1.8    | 4.8 ± 1.8   | <0.0001                  |
| Calcium (mg/4184 kJ)            | 256 ± 51    | 311 ± 73    | 352 ± 65    | <0.0001                  | 203 ± 51    | 246 ± 71     | 298 ± 61    | <0.0001                  |
| Iron (mg/4184 kJ)               | 3.7 ± 0.6   | 4.4 ± 0.6   | 5.0 ± 0.7   | <0.0001                  | 3.4 ± 0.5   | 3.9 ± 0.6    | 4.4 ± 0.8   | <0.0001                  |
| Potassium (mg/4184 kJ)          | 1220 ± 206  | 1494 ± 241  | 1666 ± 197  | <0.0001                  | 1079 ± 164  | 1258 ± 199   | 1472 ± 202  | <0.0001                  |
| Magnesium (mg/4184 kJ)          | 132 ± 24    | 163 ± 24    | 179 ± 22    | <0.0001                  | 123 ± 18    | 143 ± 23     | 162 ± 22    | <0.0001                  |
| Added sugars (% of energy)      | 7.5 ± 3.2   | 6.7 ± 2.2   | 4.8 ± 1.6   | <0.0001                  | 6.3 ± 3.4   | 4.6 ± 1.9    | 4.4 ± 1.6   | 0.0006                   |
| Saturated fats (% of energy)    | 9.2 ± 1.3   | 7.7 ± 1.3   | 7.7 ± 1.2   | <0.0001                  | 7.7 ± 1.6   | 7.2 ± 1.5    | 6.8 ± 1.1   | 0.003                    |
| Sodium (mg/4184 kJ)             | 2098 ± 372  | 2327 ± 369  | 2234 ± 337  | 0.10                     | 2030 ± 346  | 2127 ± 335   | 2053 ± 315  | 0.76                     |
| Selected nutrients              |             |             |             |                          |             |              |             |                          |
| Fat (% of energy)               | 30.2 ± 3.4  | 26.8 ± 3.2  | 27.2 ± 3.4  | 0.0001                   | 26.9 ± 3.9  | 25.5 ± 4.3   | 24.6 ± 2.9  | 0.005                    |
| MUFA (% of energy)              | 11.3 ± 1.6  | 9.6 ± 1.4   | 9.7 ± 1.7   | <0.0001                  | 10.3 ± 1.7  | 9.5 ± 1.9    | 8.8 ± 1.4   | <0.0001                  |
| PUFA (% of energy)              | 6.2 ± 0.7   | 6.1 ± 0.8   | 6.3 ± 0.8   | 0.55                     | 5.8 ± 0.7   | 5.7 ± 1.0    | 5.8 ± 0.8   | 0.93                     |
| Carbohydrate (% of energy)      | 52.9 ± 4.2  | 56.1 ± 4.2  | 54.7 ± 4.4  | 0.08                     | 52.9 ± 5.6  | 51.8 ± 6.4   | 54.1 ± 5.8  | 0.37                     |
| Alcohol (% of energy)           | 1.6 ± 2.8   | 1.3 ± 1.7   | 1.3 ± 2.3   | 0.54                     | 4.9 ± 4.9   | 6.8 ± 6.4    | 5.3 ± 5.8   | 0.80                     |
| Vitamin E (mg/4184 kJ)          | 3.8 ± 0.7   | 4.0 ± 0.5   | 4.3 ± 0.7   | 0.0001                   | 3.3 ± 0.5   | 3.5 ± 0.6    | 3.9 ± 0.6   | <0.0001                  |
| Vitamin K (µg/4184 kJ)          | 89 ± 23     | 137 ± 36    | 164 ± 49    | <0.0001                  | 78 ± 16     | 106 ± 34     | 133 ± 31    | <0.0001                  |
| Thiamine (mg/4184 kJ)           | 0.4 ± 0.1   | 0.5 ± 0.1   | 0.5 ± 0.1   | <0.0001                  | 0.4 ± 0.1   | 0.5 ± 0.1    | 0.5 ± 0.1   | <0.0001                  |
| Riboflavin (mg/4184 kJ)         | 0.6 ± 0.1   | 0.7 ± 0.1   | 0.8 ± 0.1   | <0.0001                  | 0.6 ± 0.1   | 0.6 ± 0.1    | 0.7 ± 0.1   | <0.0001                  |
| Niacin (mg/4184 kJ)             | 8.7 ± 1.5   | 9.0 ± 1.6   | 10.5 ± 2.0  | <0.0001                  | 8.8 ± 1.7   | 9.5 ± 1.5    | 9.9 ± 2.2   | 0.008                    |
| Vitamin B-6 (mg/4184 kJ)        | 0.6 ± 0.1   | 0.7 ± 0.1   | 0.8 ± 0.1   | <0.0001                  | 0.6 ± 0.1   | 0.7 ± 0.1    | 0.7 ± 0.1   | <0.0001                  |
| Vitamin B-12 (µg/4184 kJ)       | 3.4 ± 1.3   | 4.3 ± 1.2   | 5.0 ± 1.8   | <0.0001                  | 3.2 ± 1.1   | 4.3 ± 1.5    | 5.0 ± 1.9   | <0.0001                  |
| Folate (µg/4184 kJ)             | 154 ± 44    | 197 ± 34    | 233 ± 39    | <0.0001                  | 138 ± 31    | 168 ± 30     | 207 ± 51    | <0.0001                  |
| Zinc (mg/4184 kJ)               | 4.2 ± 0.4   | 4.4 ± 0.4   | 4.6 ± 0.4   | <0.0001                  | 4.1 ± 0.5   | 4.2 ± 0.5    | 4.4 ± 0.5   | 0.003                    |
| Energy (kJ/d)                   | 7598 ± 1458 | 7987 ± 1112 | 7499 ± 959  | 0.71                     | 9793 ± 1845 | 10196 ± 1717 | 9666 ± 1692 | 0.75                     |

NRF9.3, Nutrient-Rich Food Index 9.3; RAE, retinol activity equivalent; T, tertile. <sup>a</sup> In each season, a 4-day weighed dietary record was conducted: November and December 2002 (autumn), February 2003 (winter), May 2003 (spring) and August and September 2003 (summer). For each individual, the mean value of the 16-day data was used. Values are means ± standard deviations unless otherwise indicated. <sup>b</sup> Calculated based on general linear models. <sup>c</sup> A higher score indicates a higher diet quality.

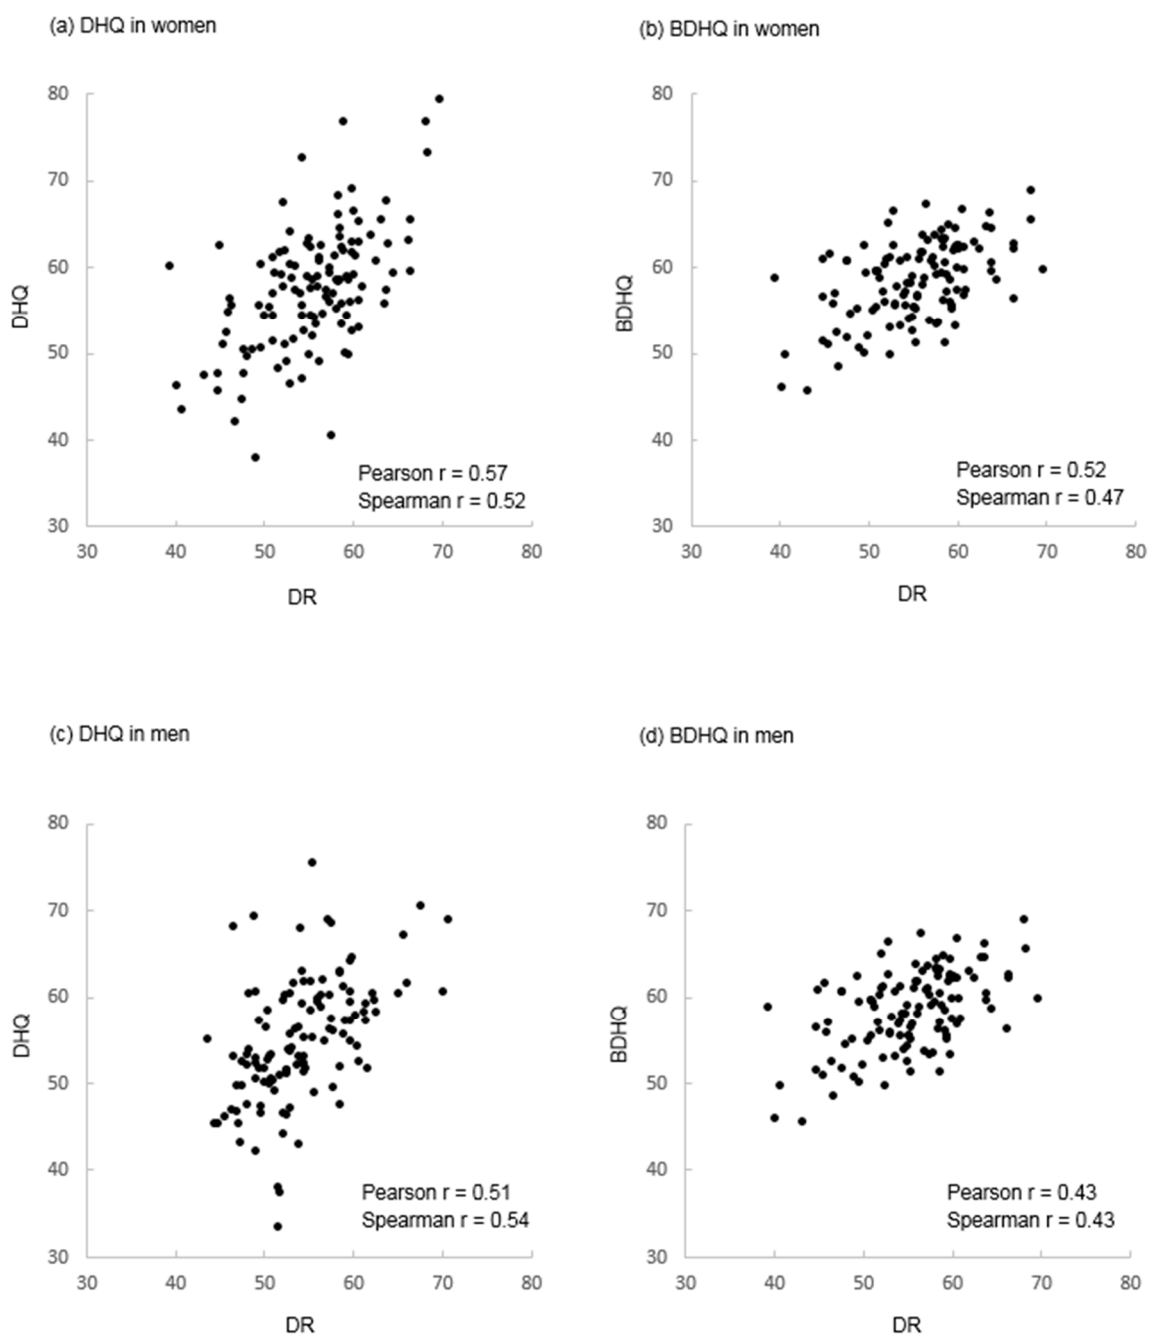

**Figure S1.** Relationship between the total score of the Healthy Eating Index-2015 estimated by a 16-day weighed dietary record (DR) conducted over a year and that estimated by a comprehensive diet history questionnaire (DHQ) or by a brief diet history questionnaire (BDHQ) in Japanese women ( $n = 121$ ) and men ( $n = 121$ ). In each season, a 4-day weighed DR was conducted: November and December 2002 (autumn), February 2003 (winter), May 2003 (spring) and August and September 2003 (summer). For each individual, the mean value of the 16-day data was used. The DHQ and BDHQ used in this analysis were conducted before the period of the DR (November 2002).

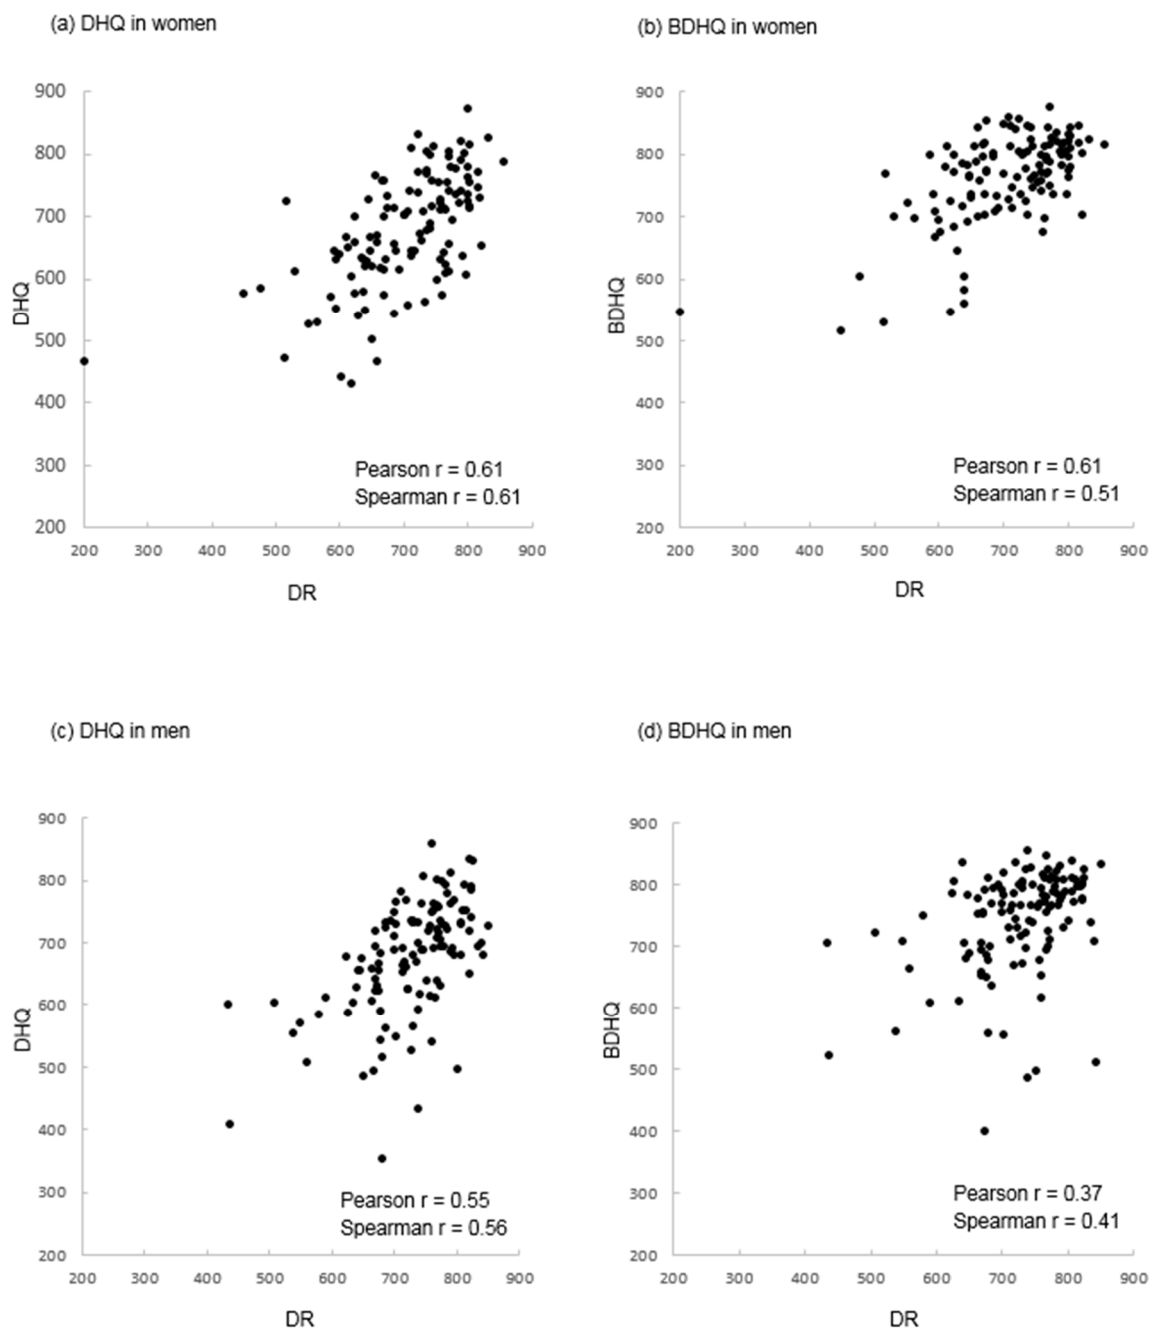

**Figure S2.** Relationship between the total score of the Nutrient-Rich Food Index 9.3 estimated by a 16-day weighed dietary record (DR) conducted over a year and that estimated by a comprehensive diet history questionnaire (DHQ) or by a brief diet history questionnaire (BDHQ) in Japanese women ( $n = 121$ ) and men ( $n = 121$ ). In each season, a 4-day weighed DR was conducted: November and December 2002 (autumn), February 2003 (winter), May 2003 (spring) and August and September 2003 (summer). For each individual, the mean value of the 16-day data was used. The DHQ and BDHQ used in this analysis were conducted before the period of the DR (November 2002).
